# Supplementary material for: Resistance to a tyrosine kinase inhibitor mediated by changes to the conformation space of the kinase
Source: Royal Society of Chemistry journal article supplement (doi:10.1039/d2cp05549j), 2023-01-01
Supplement: d2cp05549j1.pdf [file d2cp05549j1.pdf]

Electronic supporting information for:  
**Resistance to tyrosine kinase inhibitors can be mediated by changes to the conformation space of the kinase**

**1 Supplemental Figures**

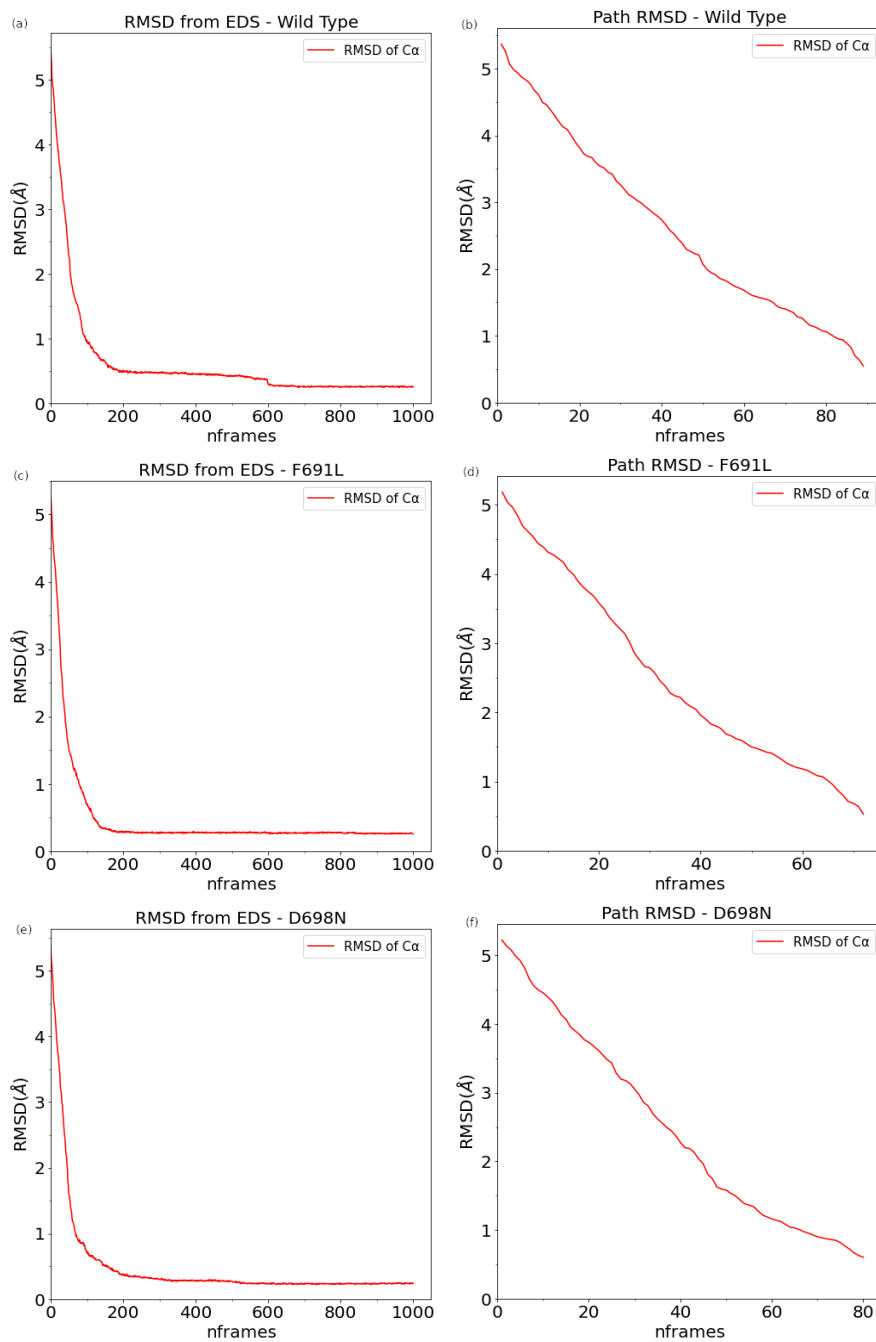

Figure S1: C $\alpha$  Root mean square deviation (RMSD) profiles with respect to the target structures, for trajectories calculated by EDS (a, c and e) and wT-metaD (b, d and f), shown for wt-FLT (a and b), and the mutants F691L (c and d), and D698N (e and f).
